# Supplementary material for: The N-terminus of the prion protein is a toxic effector regulated by the C-terminus
Source: eLife journal article supplement (doi:10.7554/elife.23473), 2017-05-20
Supplement: supp [file elife-23473-supp-v1.zip]

Archive with 15 entries (15 files):
- elife_poa_e23473_Figure_2_figure_Supplement_1.pdf
- elife_poa_e23473_Figure_4_figure_Supplement_5.pdf
- elife_poa_e23473_Figure_5_figure_Supplement_1.pdf
- elife_poa_e23473_Figure_1_figure_Supplement_1.pdf
- elife_poa_e23473_Figure_4_figure_Supplement_2.pdf
- elife_poa_e23473_Figure_1_figure_Supplement_2.pdf
- elife_poa_e23473_Figure_5_figure_Supplement_2.pdf
- elife_poa_e23473_Figure_5_source_data_1.xlsx
- elife_poa_e23473_Figure_4_figure_Supplement_3.pdf
- elife_poa_e23473_Figure_4_source_data_1.xlsx
- elife_poa_e23473_Figure_3_figure_Supplement_1.pdf
- elife_poa_e23473_Figure_1_source_data_1.xlsx
- elife_poa_e23473_Figure_4_figure_Supplement_1.pdf
- elife_poa_e23473_Figure_2_source_data_1.xlsx
- elife_poa_e23473_Figure_4_figure_Supplement_4.pdf
