# Supplementary material for: The N-terminus of the prion protein is a toxic effector regulated by the C-terminus
Source: eLife journal article supplement (doi:10.7554/elife.23473), 2017-05-20
Supplement: supp [file elife-23473-supp-v1.zip › elife_poa_e23473_Figure_1_source_data_1.xlsx]

## Sheet: panel A
	dCR				dCR/d51-90				dCR+100B3				dCR/d51-90+100B3
	time (s)	% of time			time (s)	% of time			time (s)	% of time			time (s)	% of time
	41.01	0.1367			297.63	0.9921			0	0			76.68	0.2556
	299.76	0.9992			295.05	0.9835			0	0			0	0
	295.99	0.986633			290.12	0.967067			0	0			115.78	0.385933
	119.69	0.398967			290.57	0.968567			25.33	0.0844333			0	0
	31.58	0.105267			269.73	0.8991			0	0			85.67	0.285567
	236.71	0.789033			172.27	0.574233			0	0			0	0
	275.7	0.919			127.27	0.424233			0	0			0	0
	297.22	0.990733			205.73	0.685767			0	0			0	0
	108.96	0.3632			256.79	0.855967			0	0			0	0
	279.75	0.9325			233.47	0.778233			0	0			0	0
average	198.637	0.662123			243.863	0.812877			2.533	0.00844333			27.813	0.09271
STEDV	110.764	0.369214			58.6421	0.195474			8.01005	0.0267002			45.8119	0.152706
SEM	35.0267	0.116756			18.5443	0.0618142			2.533	0.00844333			14.487	0.04829
	3.27085e-08
	2.67048e-05

## Sheet: panel B
	dCR				dCR/d51-90				dCR+POM11				dCR/d51-90+POM11
	time (s)	% of time			time (s)	% of time			time (s)	% of time			time (s)	% of time
	144.95	0.483167			240.8	0.802667			0	0			80.36	0.267867
	118.54	0.395133			267.48	0.8916			0	0			236.14	0.787133
	292.93	0.976433			93.76	0.312533			0	0			258.34	0.861133
	147.69	0.4923			203.34	0.6778			0	0			50.43	0.1681
	261.24	0.8708			24.51	0.0817			0	0			82.95	0.2765
	289.56	0.9652			259.63	0.865433			0	0			111.71	0.372367
	238.66	0.795533			96.33	0.3211			0	0			106.52	0.355067
	37.53	0.1251			279.54	0.9318			0	0			0	0
	109.76	0.365867			76.42	0.254733			0	0			91.95	0.3065
	213.82	0.712733			37.96	0.126533			0	0			99.6	0.332
average	185.468	0.618227			157.977	0.52659			0	0			111.8	0.372667
STEDV	86.2319	0.28744			101.55	0.338502			0	0			78.5928	0.261976
SEM	27.2689	0.0908964			32.1131	0.107044			0	0			24.8532	0.0828441
		2.27794e-06
		0.270381

## Sheet: panel C
	dCR				dCR/d51-90				dCR+cu				dCR/d51-90+cu
	time (s)	% of time			time (s)	% of time			time (s)	% of time			time (s)	% of time
	214.89	0.7163			297.63	0.9921			0	0			276.84	0.9228
	116.42	0.388067			295.05	0.9835			153.56	0.511867			283.97	0.946567
	126.51	0.4217			290.12	0.967067			0	0			202.08	0.6736
	155.92	0.519733			290.57	0.968567			106.59	0.3553			299.1	0.997
	177.22	0.590733			299.73	0.9991			0	0			251.64	0.8388
	88.96	0.296533			272.45	0.908167			3.17	0.0105667			268.04	0.893467
	199.75	0.665833			248.95	0.829833			149.24	0.497467			271.97	0.906567
	156.89	0.522967			297.98	0.993267			0	0			299.29	0.997633
	145.86	0.4862			279.45	0.9315			0	0			253.49	0.844967
					159.75	0.5325			0	0			293.07	0.9769
average	153.602	0.512007			273.168	0.91056			41.256	0.13752			269.949	0.89983
STEDV	40.0232	0.133411			42.7898	0.142633			66.8366	0.222789			29.2677	0.097559
SEM	12.6564	0.0421882			13.5313	0.0451044			21.1356	0.0704519			9.25526	0.0308509
	0.000409784	0.000409784
	0.846532	0.846532
