# Supplementary material for: The N-terminus of the prion protein is a toxic effector regulated by the C-terminus
Source: eLife journal article supplement (doi:10.7554/elife.23473), 2017-05-20
Supplement: supp [file elife-23473-supp-v1.zip › elife_poa_e23473_Figure_2_source_data_1.xlsx]

## Sheet: Sheet1
	1-31 PrP				1-58 PrP				1-90 PrP				1-109 PrP				32-109 PrP
	time (s)	% of time			time (s)	% of time			time (s)	% of time			time (s)	% of time			time (s)	% of time
	0	0			39.98	0.133267			298.29	0.9943			129.15	0.4305			6.39	0.0213
	0	0			50.68	0.168933			10.01	0.0333667			167.24	0.557467			70.36	0.234533
	0	0			32.39	0.107967			193.77	0.6459			239.64	0.7988			0	0
	0	0			36.13	0.120433			45.45	0.1515			156.01	0.520033			0	0
	0	0			119.11	0.397033			91.55	0.305167			125.61	0.4187			0	0
	0	0			27.15	0.0905			104.77	0.349233			109.17	0.3639			0	0
	0	0			0	0			99.32	0.331067			181.13	0.603767			0	0
	0	0			97.05	0.3235			0	0			252.51	0.8417			0	0
	0	0			37.3	0.124333			115.3	0.384333			245.02	0.816733			30.31	0.101033
	0	0			89.01	0.2967			95.58	0.3186			189.63	0.6321			0	0
average	0	0			52.88	0.176267			105.404	0.351347			179.511	0.59837			10.706	0.0356867
STEDV	0	0			36.8412	0.122804			87.7128	0.292376			52.1036	0.173679			23.0069	0.0766898
SEM	0	0			11.6502	0.0388341			27.7372	0.0924574			16.4766	0.054922			7.27543	0.0242514
		0.000254199				0.0978771				0.0338301
		0.00131112				6.44507e-06				0.00396029
		2.35106e-09				0.00659125				2.39956e-08
		0.158416
