# Supplementary material for: The N-terminus of the prion protein is a toxic effector regulated by the C-terminus
Source: eLife journal article supplement (doi:10.7554/elife.23473), 2017-05-20
Supplement: supp [file elife-23473-supp-v1.zip › elife_poa_e23473_Figure_4_source_data_1.xlsx]

## Sheet: Panel A
	dCR			dCR+PPS				POM1				POM1+PPS				D18				D18+PPS
	time (s)	% of time		time (s)	% of time			time (s)	% of time			time (s)	% of time			time (s)	% of time			time (s)	% of time
	289.87	0.966233		0	0			251.25	0.8375			0	0			268.02	0.8934			0	0
	202.9	0.676333		0	0			70.77	0.2359			0	0			91.04	0.303467			0	0
	272.66	0.908867		0	0			148.73	0.495767			0	0			256.4	0.854667			0	0
	277.38	0.9246		0	0			148.45	0.494833			0	0			232.09	0.773633			0	0
	54.43	0.181433		0	0			252.09	0.8403			0	0			262.37	0.874567			0	0
	148.39	0.494633		0	0			46.22	0.154067			0	0			286.34	0.954467			0	0
	199.76	0.665867		0	0			58.68	0.1956			0	0			243.62	0.812067			0	0
	190.42	0.634733		0	0			250.12	0.833733			0	0			107.39	0.357967			0	0
	196.23	0.6541		0	0			203.2	0.677333			0	0			288.22	0.960733			0	0
	238.36	0.794533		0	0			182.62	0.608733							87.33	0.2911
average	207.04	0.690133		0	0			161.213	0.537377			0	0			212.282	0.707607			0	0
STEDV	70.1493	0.233831		0	0			80.7781	0.26926			0	0			82.6656	0.275552			0	0
SEM	22.1832	0.0739438		0	0			25.5443	0.0851476			0	0			26.1412	0.0871372			0	0
		2.55492e-08							1.52222e-05								6.31983e-07

## Sheet: Panel B
	WT-PrP_POM1				WT-PrP_POM11				WT_POM1_POM11
	211.39	0.704633			0	0			0	0
	59.54	0.198467			0	0			0	0
	41	0.136667			0	0			15.55	0.0518333
	124.9	0.416333			0	0			0	0
	212.1	0.707			0	0			14.38	0.0479333
	38.89	0.129633			0	0			0	0
	7.3	0.0243333			0	0			0	0
	294.58	0.981933			0	0			13.56	0.0452
	297.17	0.990567			0	0			0	0
	69.51	0.2317			0	0			16.67	0.0555667
average	135.638	0.452127			0	0			6.016	0.0200533
STEDV	109.548	0.365159			0	0			7.80617	0.0260206
SEM	34.642	0.115473			0	0			2.46853	0.00822843
		0.00101397
		0.00152493

## Sheet: Panel C
	WT-PrP_D18				WT-PrP_POM11				WT-PrP_D18_POM11
	158.32	0.527733			0	0			0	0
	241.34	0.804467			0	0			0	0
	226.43	0.754767			0	0			0	0
	193.39	0.644633			0	0			0	0
	162.32	0.541067			0	0			0	0
	190.34	0.634467			0	0			0	0
	81.15	0.2705			0	0			0	0
	169.03	0.563433			0	0			0	0
	178.22	0.594067			0	0			0	0
	107.33	0.357767			0	0			0	0
average	170.787	0.56929			0	0			0	0
STEDV	48.6645	0.162215			0	0			0	0
SEM	15.3891	0.0512969			0	0			0	0
		1.75671e-09
		1.75671e-09

## Sheet: Panel D
	WT-PrP_POM1				d23-31_POM1				PIPLC_POM1				WT-PrP _D18				d23-31_D18				WT_PIPLC_D18(2.5ug/ml)
	time (s)	% of time			time (s)	% of time			time (s)	% of time			time (s)	% of time			time (s)	% of time			time (s)	% of time
	286.25	0.954167			0	0			0	0			258.32	0.861067			26.55	0.0885			0	0
	225.97	0.753233			0	0			0	0			261.34	0.871133			0	0			0	0
	232.73	0.775767			0	0			0	0			246.43	0.821433			61.27	0.204233			0	0
	258.45	0.8615			0	0			0	0			197.56	0.658533			0	0			0	0
	232.09	0.773633			21.21	0.0707			0	0			83.67	0.2789			59.47	0.198233			0	0
	76.22	0.254067			0	0			0	0			239.54	0.798467			0	0			0	0
	58.68	0.1956			0	0			0	0			101.15	0.337167			0	0			0	0
	50.43	0.1681			0	0			0	0			69.03	0.2301			0	0			0	0
	214.5	0.715			22.31	0.0743667			0	0			208.12	0.693733			0	0			0	0
	255.63	0.8521							0	0			207.33	0.6911			0	0			0	0
	189.095	0.630317			4.83556	0.0161185	#DIV/0!	#DIV/0!	0	0			187.249	0.624163			14.729	0.0490967			0	0
	90.3147	0.301049			9.5992	0.0319973	#DIV/0!	#DIV/0!	0	0			74.4161	0.248054			25.4431	0.0848103			0	0
	28.56	0.0952			3.03553	0.0101184	#DIV/0!	#DIV/0!	0	0			23.5324	0.0784415			8.04581	0.0268194			0	0
		1.24412e-05												5.30584e-06
		3.24072e-06												2.64574e-07
