# Supplementary material for: The N-terminus of the prion protein is a toxic effector regulated by the C-terminus
Source: eLife journal article supplement (doi:10.7554/elife.23473), 2017-05-20
Supplement: supp [file elife-23473-supp-v1.zip › elife_poa_e23473_Figure_5_source_data_1.xlsx]

## Sheet: panel A
	Tga20				WT				KO
	D18	POM1	IgG		D18	POM1	IgG		D18	POM1	IgG
	0.670189	0.745006	0.0307603		0.410404	0.424606	0.0407764		0.00903095	0.0171001	0.0280763
	0.89588	0.786545	0.0172021		0.127168	0.444602	0.0702911		0.012889	0.0119368	0.0215479
	0.83626	0.85066	0.0193428		0.267282	0.337988	0.0227516		0.0114147	0.0109285	0.0218719
		0.787013	0.0209725		0.358732	0.44447	0.0221461		0.0193707	0.0178876	0.0149995
average	0.800777	0.792306	0.0220694		0.290896	0.412916	0.0389913		0.0131763	0.0144632	0.0216239
STEDV	0.116955	0.0436028	0.0059961		0.124162	0.0508284	0.0225858		0.00442495	0.00353821	0.00534112
SEM	0.0675238	0.0251741	0.00346185		0.0716848	0.0293458	0.0130399		0.00255474	0.00204279	0.0030837
	0.00271021	0.000204372	0.284545
	3.43112e-05	3.29618e-08	0.915259

## Sheet: panel B
	IgG		D18		PPS		D18+PPS
	0.015518		0.797154		0.00928565		0.0188316
	0.0214486		0.837953		0.0140968		0.02372
	0.0196597		0.889251		0.0180082		0.0251183
	0.0157068		0.834648		0.0182987		0.0257904
average	0.0180833		0.839752		0.0149223		0.0233651
STEDV	0.00294612		0.0378329		0.00421805		0.00314294
SEM	0.00170094		0.0218428		0.00243529		0.00181458
	1.01484e-08		1.01069e-08
			1.05739e-08

## Sheet: panel C
	IgG		D18		100B3		D18+100B3
	0.0203057		0.744608		0.00858844		0.0146157
	0.0213361		0.832905		0.0101892		0.0339227
	0.0156545		0.781149		0.021864		0.0261809
	0.0119575		0.793189		0.0232769		0.0264122
average	0.0173134		0.787963		0.0159796		0.0252829
STEDV	0.00434258		0.0363923		0.00766017		0.00796901
SEM	0.00250719		0.0210111		0.0044226		0.00460091
	1.20948e-08		1.30633e-08
			1.4193e-08

## Sheet: panel D
	IgG		D18		POM11		D18+POM11
	0.0122218		0.878221		0.015644		0.0153279
	0.0147307		0.778612		0.0115212		0.0258146
	0.011817		0.841502		0.0201262		0.0179651
	0.0113126		0.84372		0.0140783		0.0273519
average	0.0125205		0.835514		0.0153424		0.0216149
STEDV	0.00151964		0.0414927		0.00361362		0.00587077
SEM	0.000877366		0.0239558		0.00208633		0.00338949
	1.72178e-08		1.79048e-08
			1.94461e-08
