# Supplementary figures and images for: The N-terminus of the prion protein is a toxic effector regulated by the C-terminus
Source: eLife journal article supplement (doi:10.7554/elife.23473), 2017-05-20

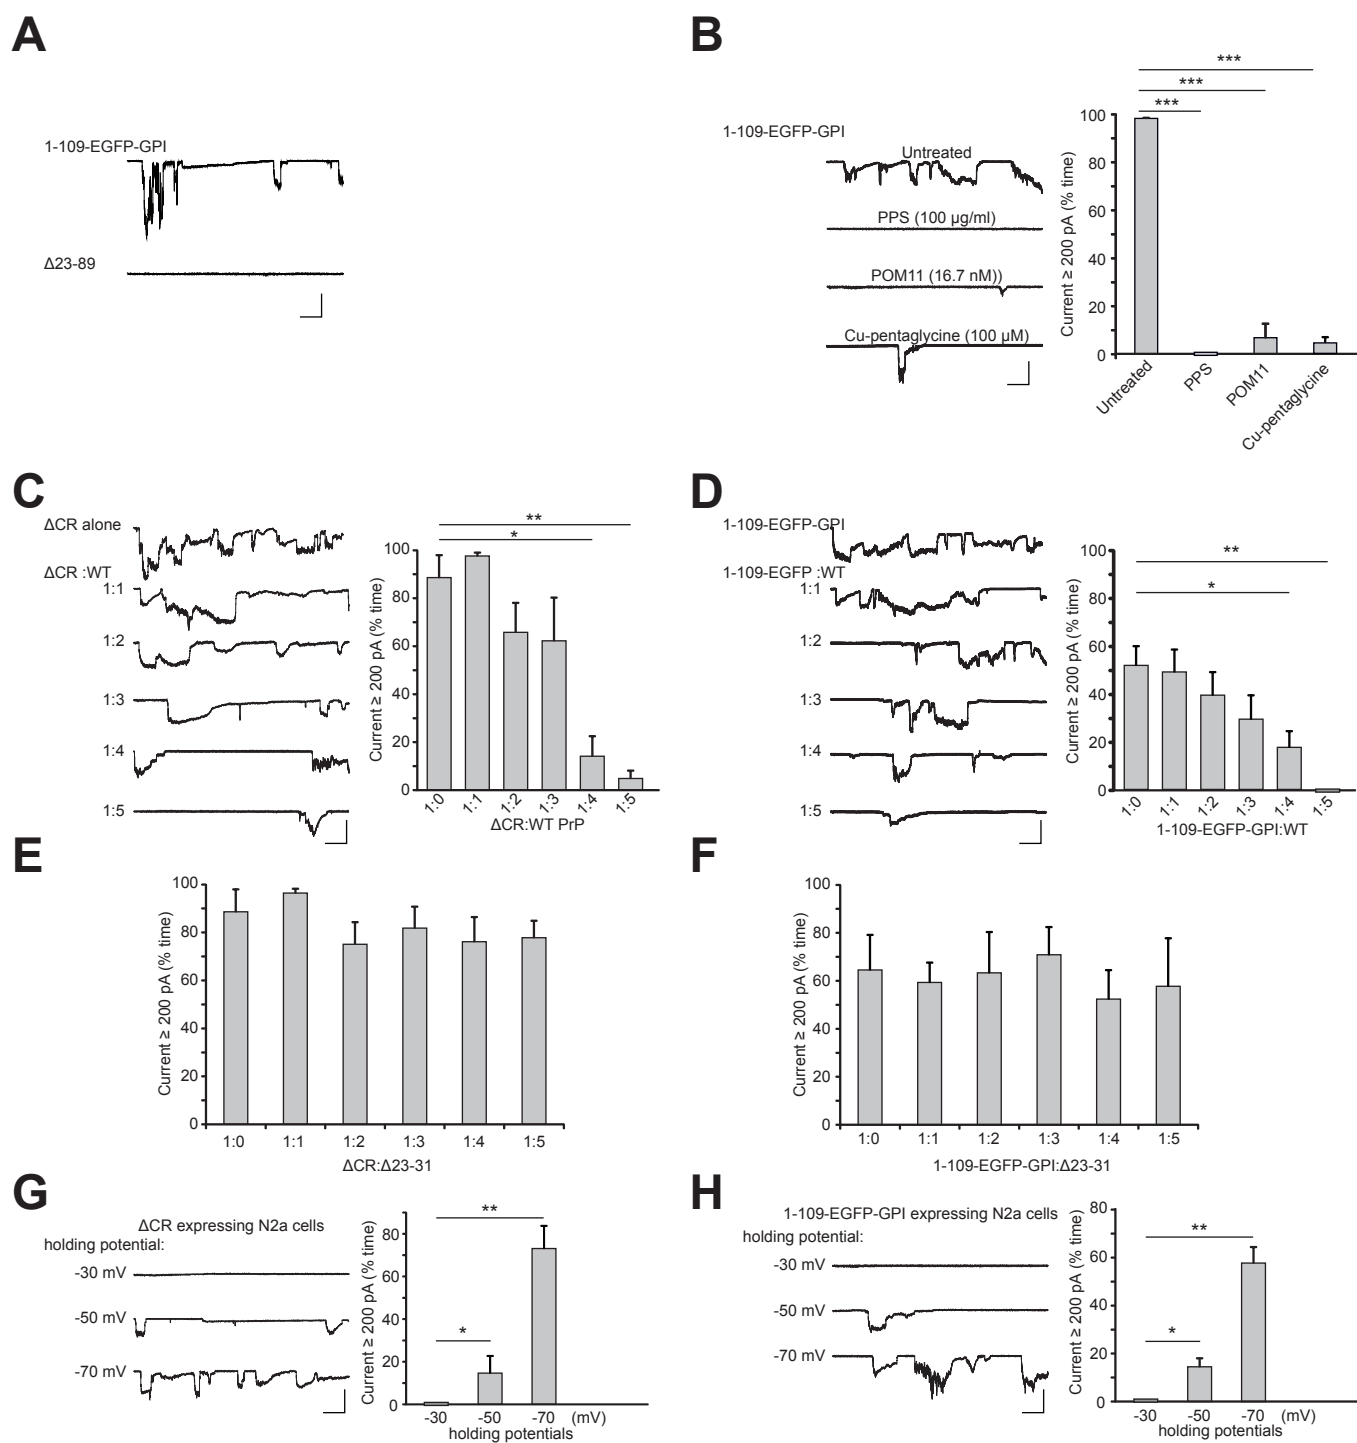

Figure 2-figure supplement 1

Supplement: supp [file elife-23473-supp-v1.zip › elife_poa_e23473_Figure_2_figure_Supplement_1.pdf]

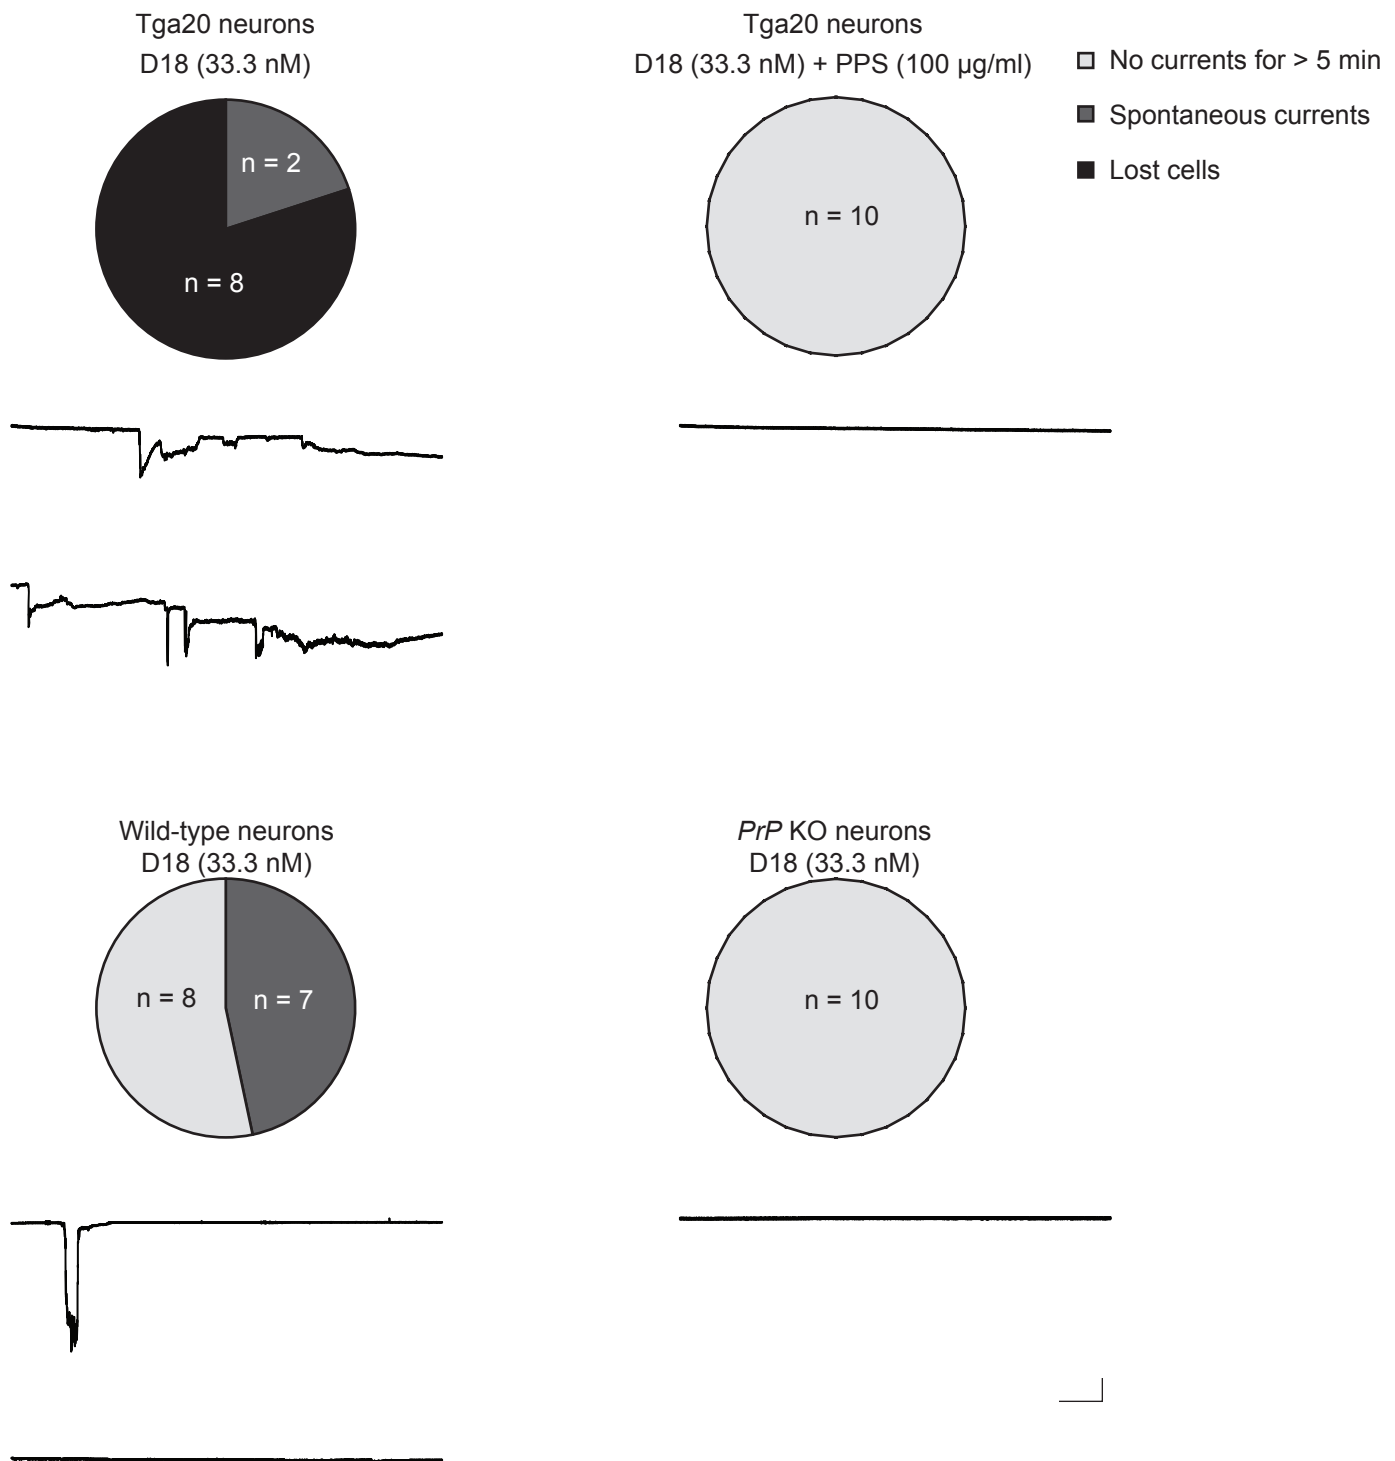

Figure 4-figure supplement 5

Supplement: supp [file elife-23473-supp-v1.zip › elife_poa_e23473_Figure_4_figure_Supplement_5.pdf]

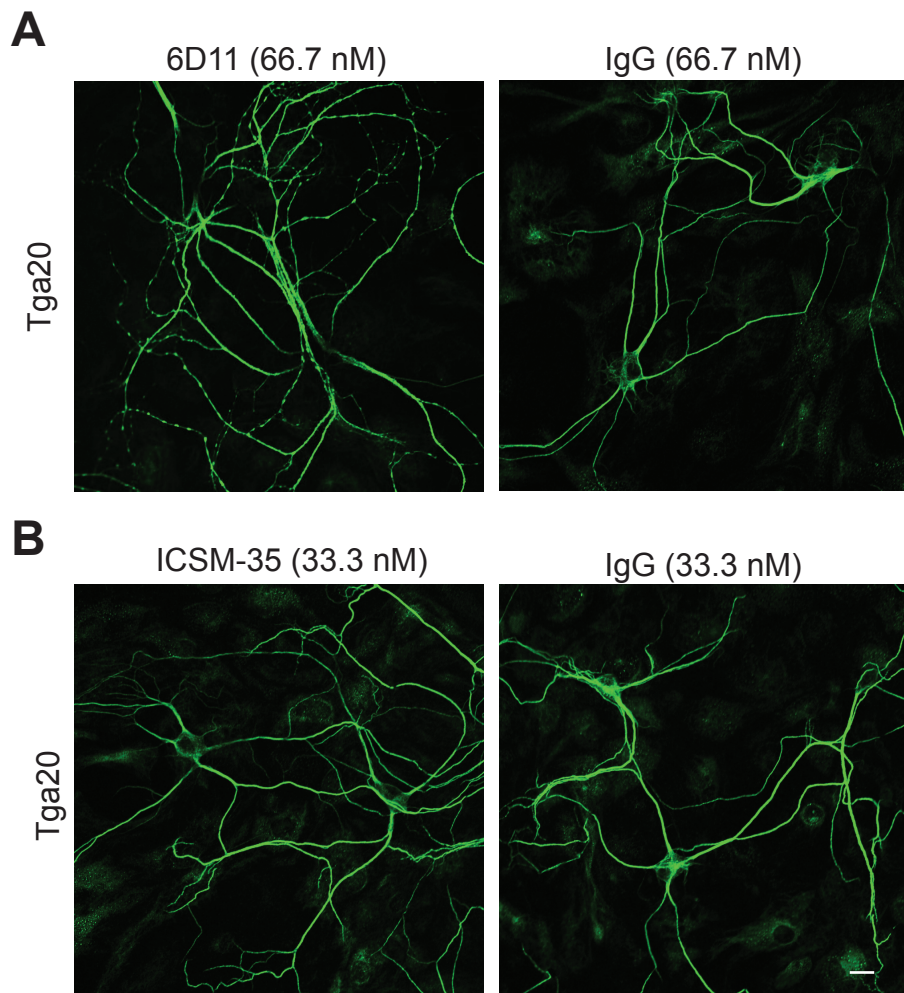

Figure 5-figure supplement 1

Supplement: supp [file elife-23473-supp-v1.zip › elife_poa_e23473_Figure_5_figure_Supplement_1.pdf]

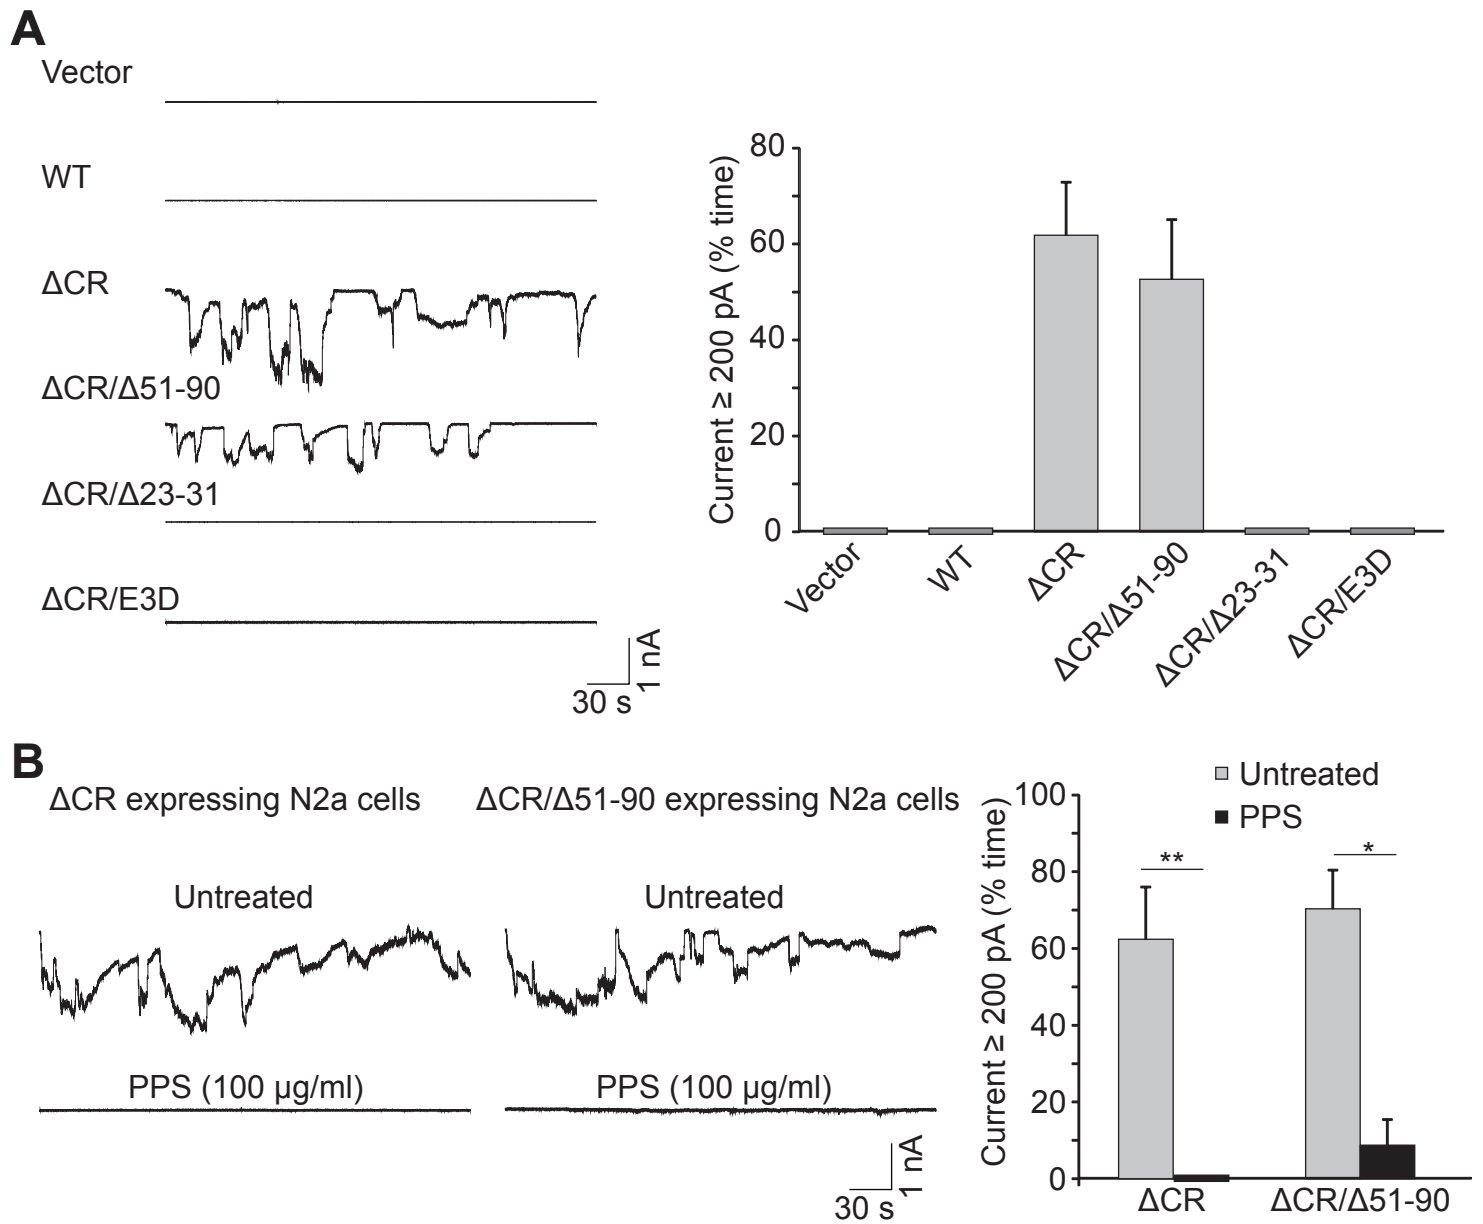

Figure 1-figure supplement 1

Supplement: supp [file elife-23473-supp-v1.zip › elife_poa_e23473_Figure_1_figure_Supplement_1.pdf]

**A**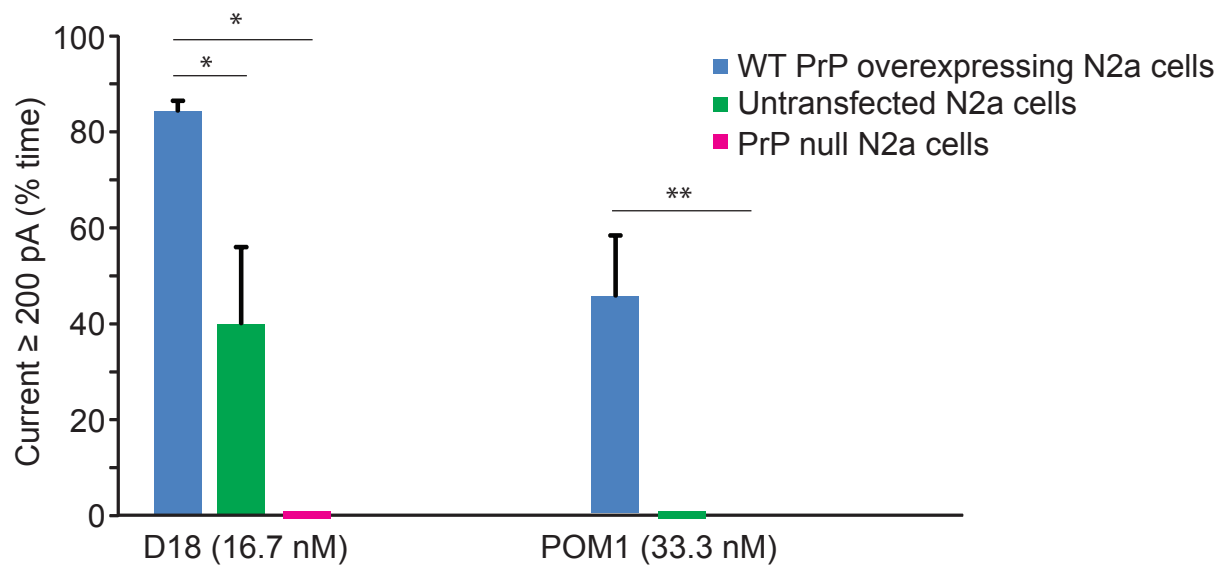**B**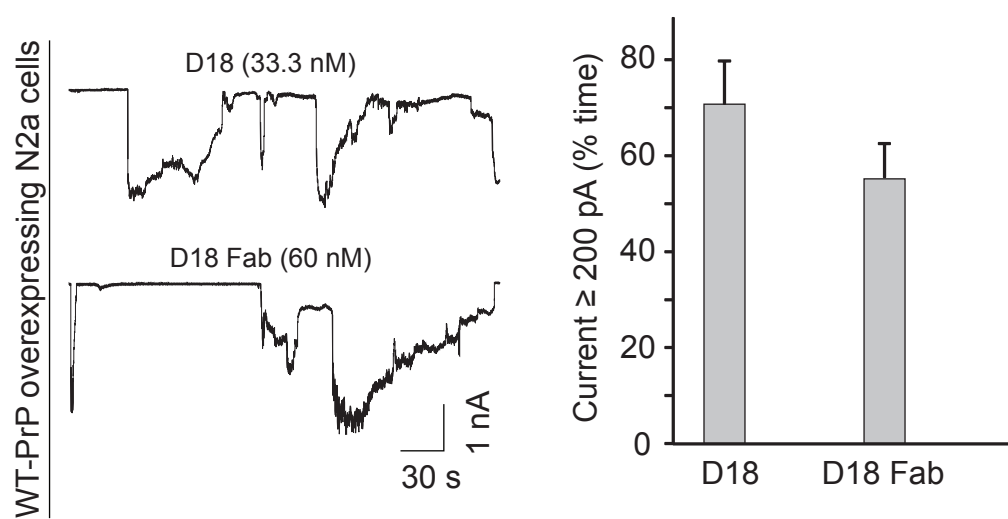

Figure 4-figure supplement 2

Supplement: supp [file elife-23473-supp-v1.zip › elife_poa_e23473_Figure_4_figure_Supplement_2.pdf]

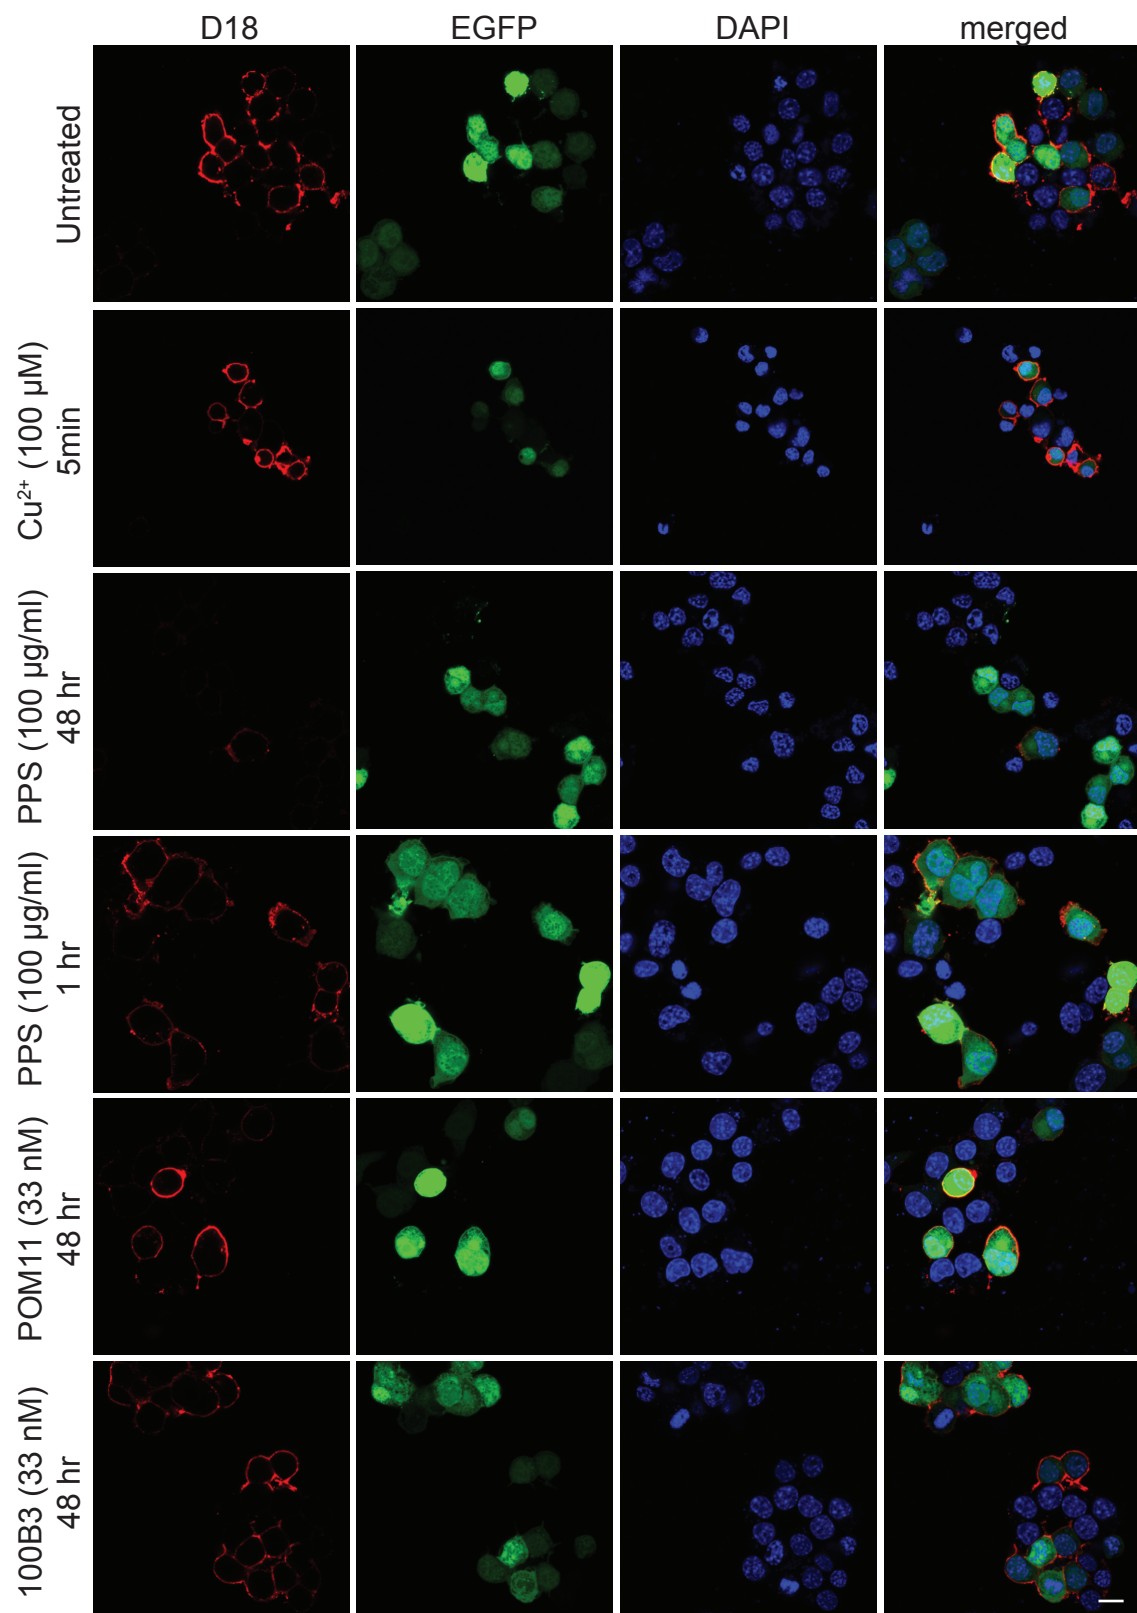

Figure 1-figure supplement 2

Supplement: supp [file elife-23473-supp-v1.zip › elife_poa_e23473_Figure_1_figure_Supplement_2.pdf]

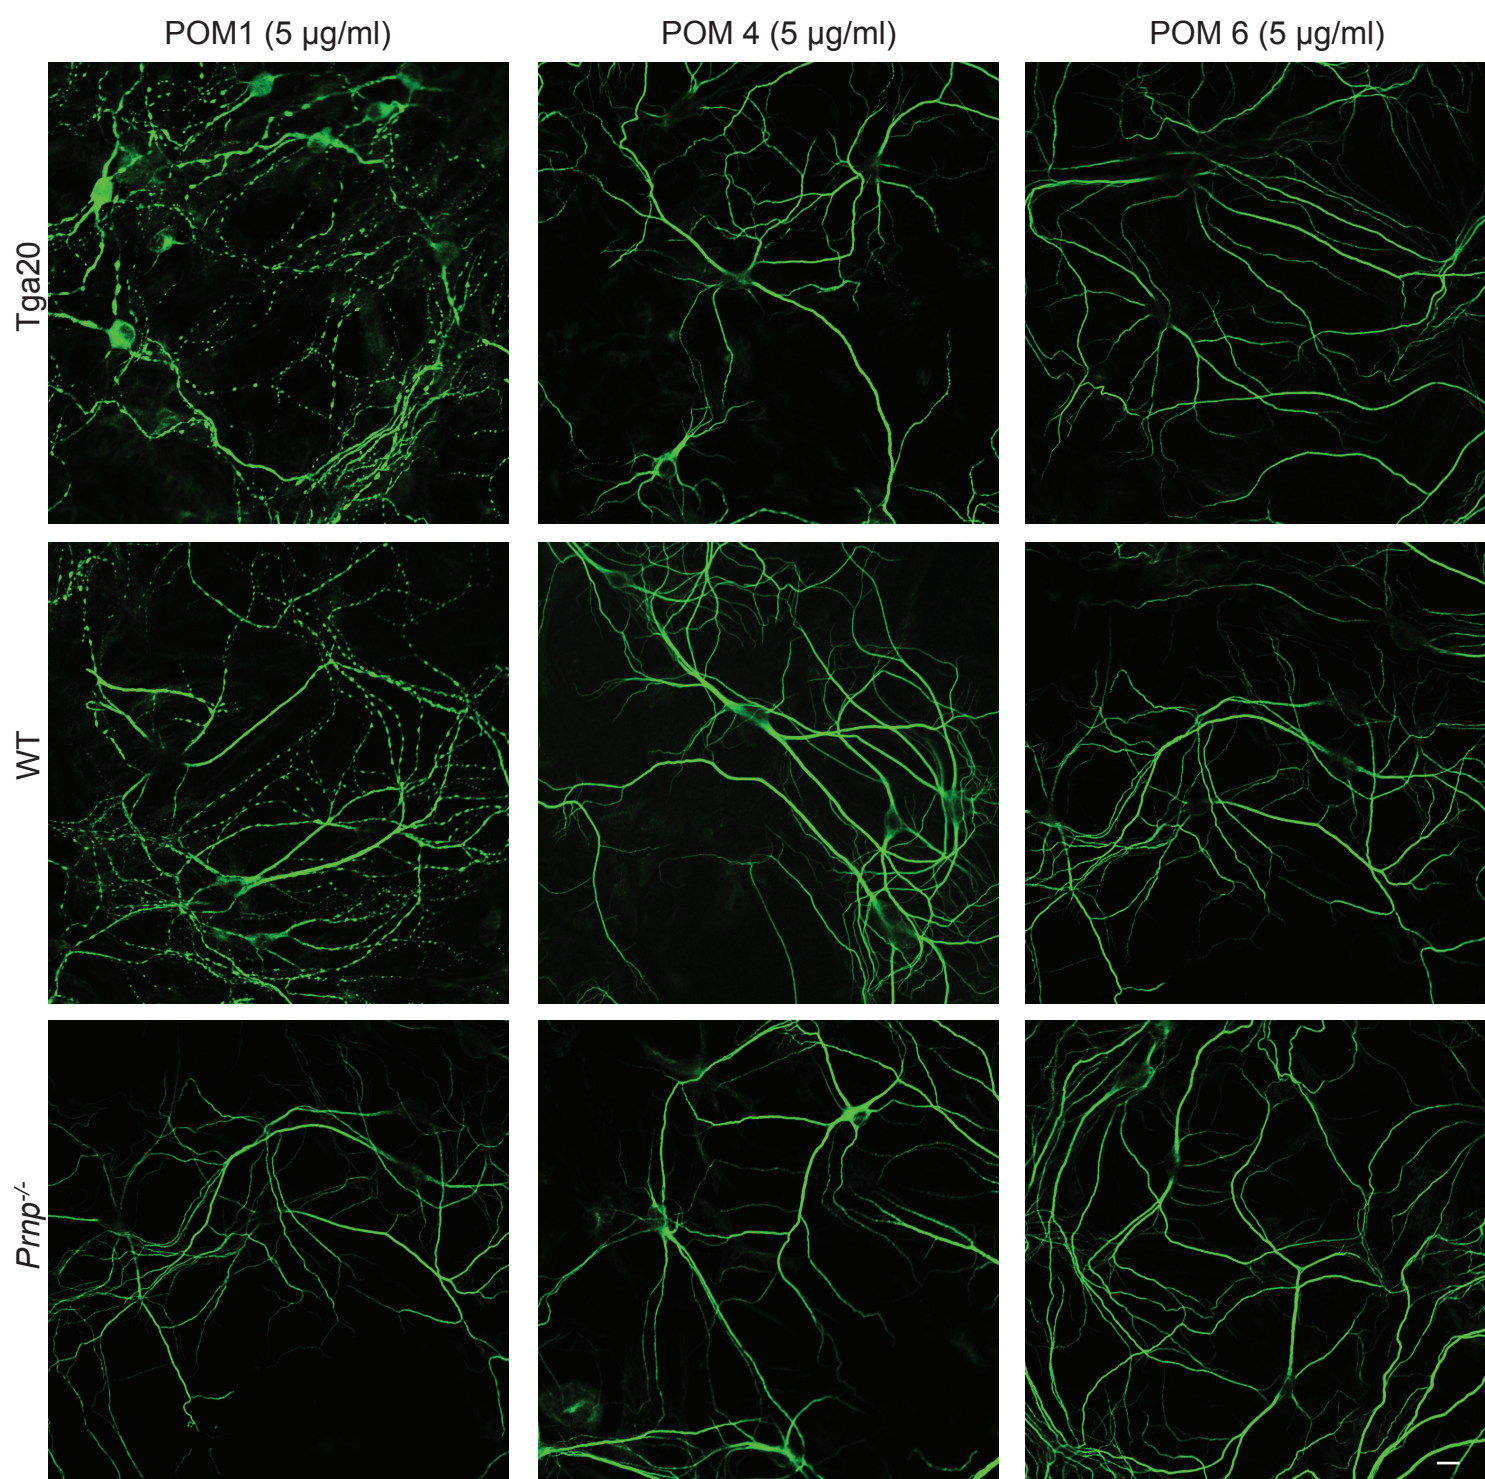

Figure 5-figure supplement 2

Supplement: supp [file elife-23473-supp-v1.zip › elife_poa_e23473_Figure_5_figure_Supplement_2.pdf]

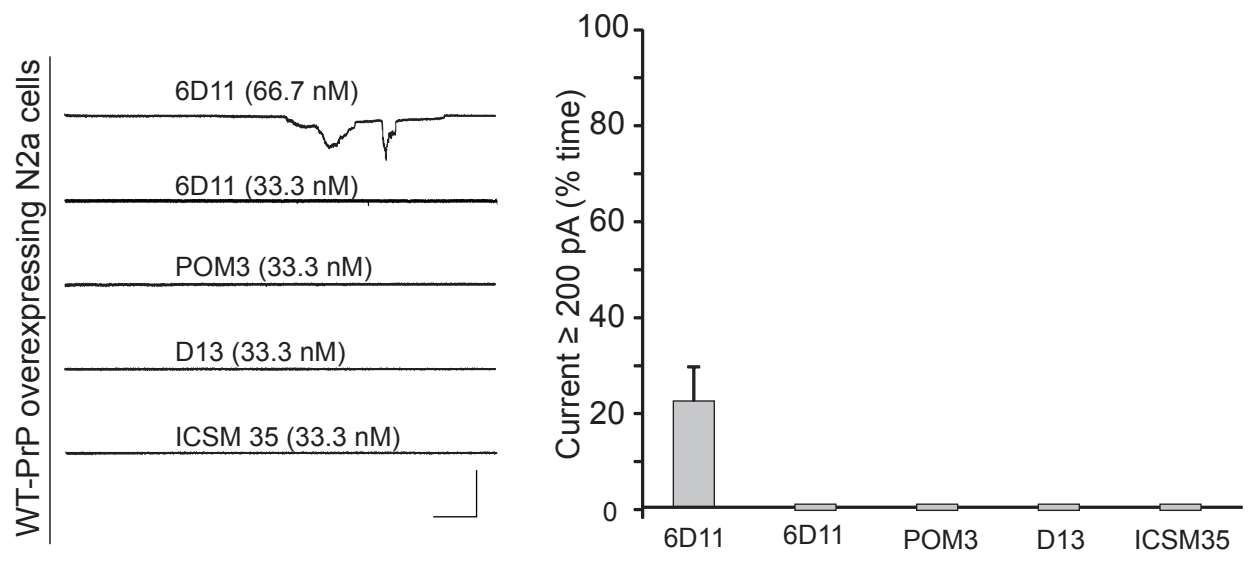

Figure 4-figure supplement 3

Supplement: supp [file elife-23473-supp-v1.zip › elife_poa_e23473_Figure_4_figure_Supplement_3.pdf]

A1

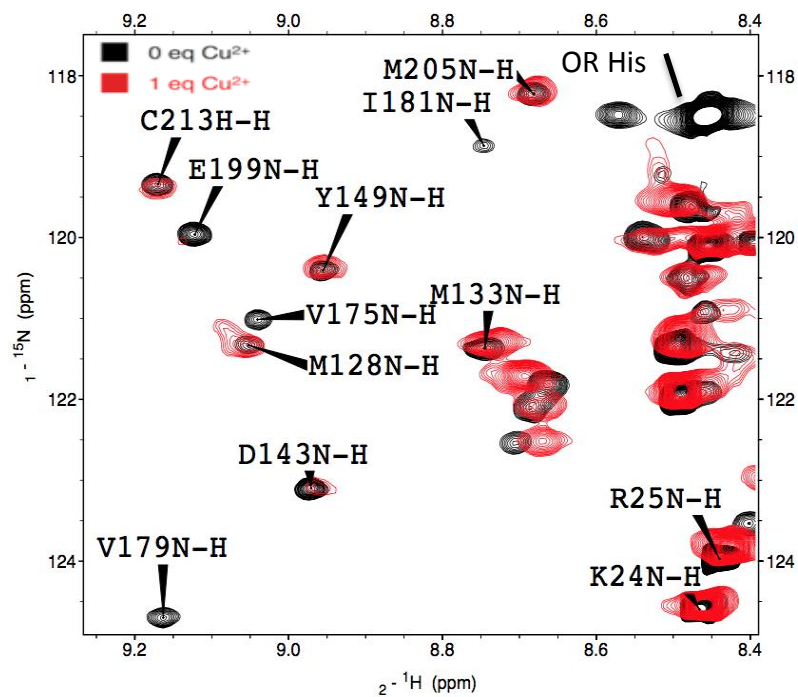

A2

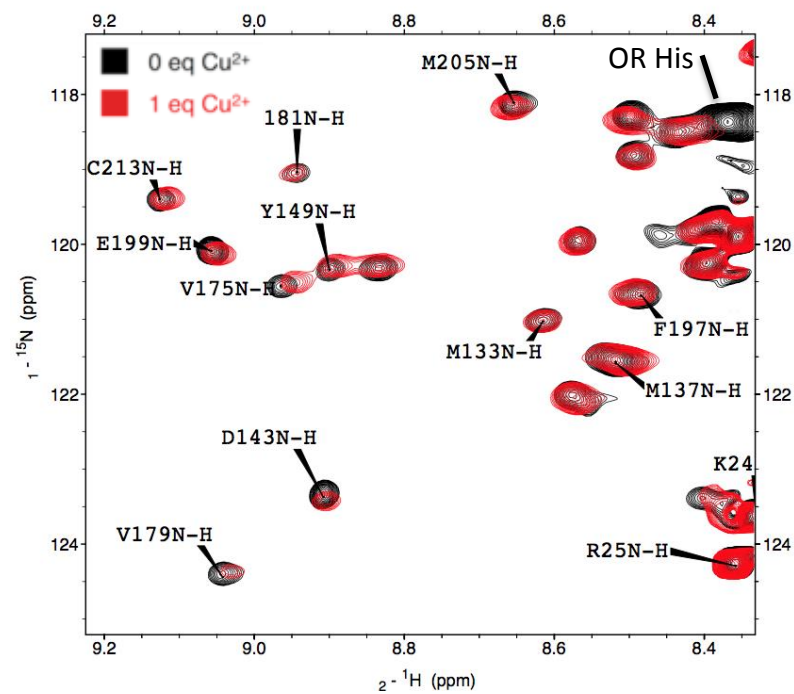

Figure 3-figure supplement 1

Supplement: supp [file elife-23473-supp-v1.zip › elife_poa_e23473_Figure_3_figure_Supplement_1.pdf]

**A**

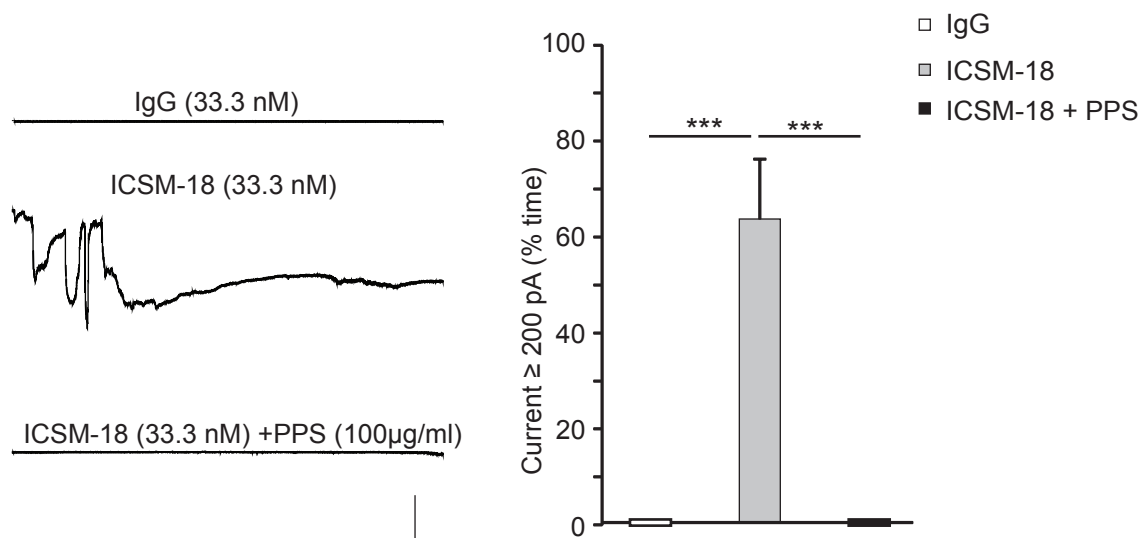

**B**

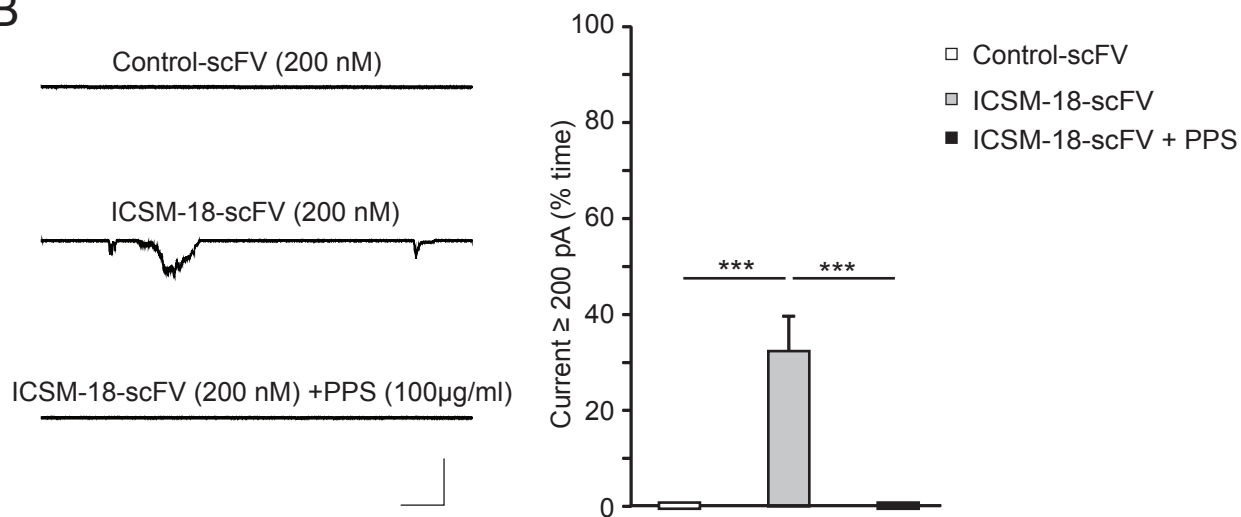

Figure 4-figure supplement 1

Supplement: supp [file elife-23473-supp-v1.zip › elife_poa_e23473_Figure_4_figure_Supplement_1.pdf]

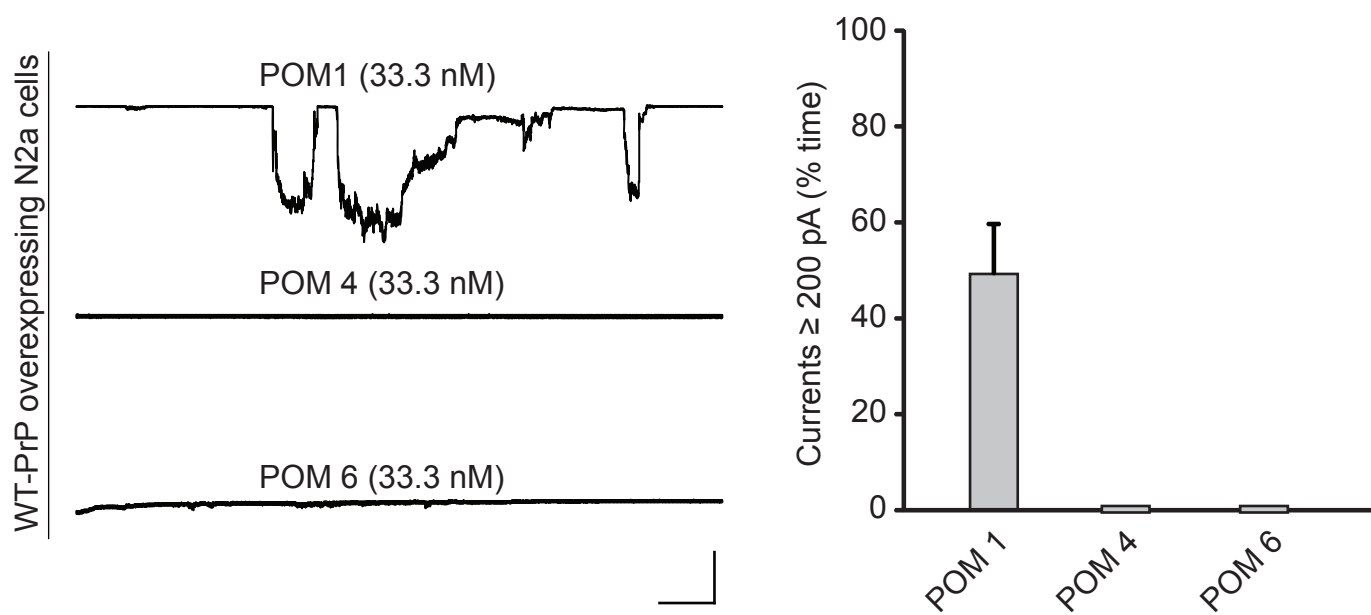

Figure 4-figure supplement 4

Supplement: supp [file elife-23473-supp-v1.zip › elife_poa_e23473_Figure_4_figure_Supplement_4.pdf]
